# Supplementary material
Source: Springer Nature journal article supplement (https://www.springermedizin.de/resource/supplementary/13098_2009_56_MOESM1_ESM.pdf/9670414)

**PREGNANT WOMAN**  
*without* risk factors for GD

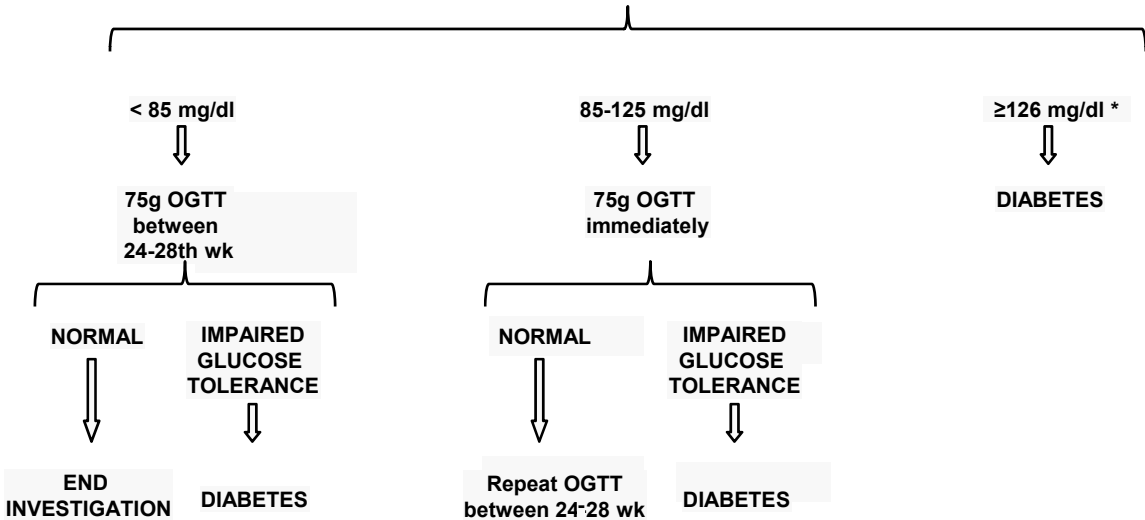

**PREGNANT WOMAN**  
*with* risk factors for GD

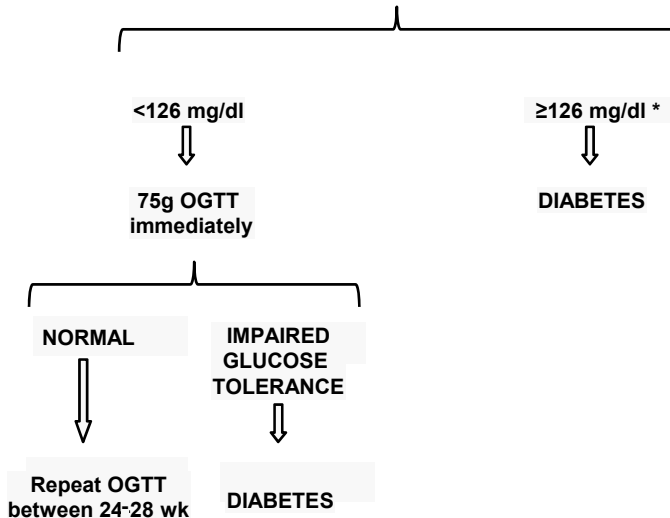

Supplement: MOESM1 [file 9670414]
